# Supplementary material
Source: Springer Nature journal article supplement (https://www.springermedizin.de/resource/supplementary/12943_2003_46_MOESM2_ESM.pdf/9553318)

BXPC-3

BXPC-3 asp8

Panc-1

Panc-1 asp8

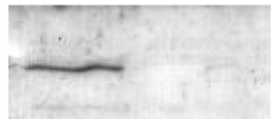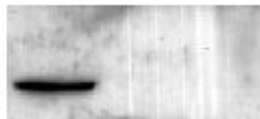

← p8

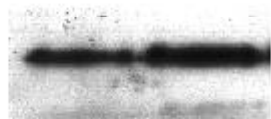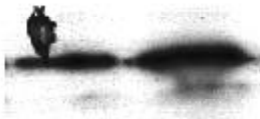

←  $\beta$ -tubulin

Supplement: MOESM2 [file 9553318]
